# Molecular Pathology of Malignant Melanoma

Andrzej Slominski, MD, PhD,<sup>1</sup> Jacobo Wortsman, MD,<sup>2</sup> Brian Nickoloff, MD PhD,<sup>1</sup> Kenneth McClatchey, MD,<sup>1</sup> Martin C. Mihm, MD,<sup>3</sup> and Jeffrey S. Ross, MD<sup>4</sup>

**Key Words:** Melanoma; Melanoma markers; Progression; Pathology; Molecular biology

Cutaneous malignant melanoma has been one of the most rapidly increasing malignancies in humans, featuring a capacity to occur in young persons and a refractoriness to therapy once metastases have occurred.<sup>1-3</sup> Melanocytes derive from the neural crest during embryonal development; cells from this area migrate to the skin in a pathway marked and modified by mesenchyme.<sup>4</sup> Epidermal melanocytes can act as sensory and regulatory cells eliciting neuroendocrine and immunomodulatory responses and operating in the context of a functional network for the maintenance of cutaneous homeostasis.<sup>5</sup> Epidermal melanocytes are normally mitotically inactive or can proliferate briefly after selected external signals, such as UV radiation.<sup>2-5</sup>

Hair follicle melanocytes express, in contrast, cyclic proliferative and melanogenic activity coupled to the growing phase of hair (anagen).<sup>6</sup> Because documented melanomas originating from the human follicular melanocytes are extremely rare, it seems that the local biologic clock regulating the hair cycle can act as a suppressor of malignant melanocyte transformation.<sup>6</sup> Cutaneous melanomas derive from epidermal melanocytes or dermal nevomelanocytes.<sup>2,3</sup> In addition, melanocytes or melanocyte-derived cells form one of the most common benign tumors of the body, the melanocytic nevus.<sup>2,3</sup> A variety of molecular markers of cutaneous nevi and malignant melanoma are presented in the following sections.

## Growth Factors, Cytokines, and Their Receptors

Studies using cell culture systems have shown that normal and malignant melanocytes differ in production rate and responsiveness to growth factors and cytokines, as well as in the expression of their corresponding receptors.<sup>7-20</sup>

Melanomas have been shown to produce several growth factors and cytokines and to express their receptors, including

keratinocyte growth factor (KGF), platelet-derived growth factors  $\alpha$  and  $\beta$ , scatter factor (SCF), melanoma growth-stimulating activity/gro, interleukin (IL)-1 $\alpha$ , IL-1 $\beta$ , IL-6, IL-7, IL-8, IL-10, IL-12, granulocyte-macrophage colony-stimulating factor, granulocyte colony-stimulating factor, tumor necrosis factor (TNF)  $\alpha$ , interferon (INF)- $\gamma$ , and INF- $\beta$ .<sup>8,10-22</sup> These factors can act as regulators of melanoma cell proliferation, differentiation, and motility. They also can stimulate angiogenesis and regulate expression of major histocompatibility antigens, cell adhesion molecules, integrins, nonintegrin matrix adhesion receptors, and extracellular matrix proteins on melanocytes and on surrounding cells. The expression of multicytokine resistance and multigrowth factor autonomy due to autocrine stimulatory mechanisms is characteristic of advanced stage melanoma.<sup>17,21</sup>

Basic fibroblast growth factor has a central role as growth regulator of normal melanocytes.<sup>7,8</sup> In situ studies show absence of basic fibroblast growth factor expression in epidermal melanocytes and increased expression during progression of melanocytic lesion.<sup>22</sup>

The role of insulin-like growth factors (IGFs), insulin, and their receptors in the regulation of melanoma growth has been suggested since insulin can stimulate or inhibit the growth of melanoma cells in vivo and in vitro.<sup>23-28</sup>

The antigenic profile of melanoma is distinctive according to stages of progression.<sup>29</sup> In situ analyses of the expression and localization of receptors for nerve growth factor, transferrin, and epidermal growth factor (EGF)<sup>29-31</sup> and of growth factors such as transforming growth factor (TGF)- $\alpha$ ,<sup>32</sup> TGF- $\beta$ ,<sup>33-35</sup> and IGF-I<sup>36</sup> may correlate with different stages of development of melanocytic lesions. Most remarkably, increased expression of TGF- $\beta$ , IGF-I, and the receptor for EGF (EGFR) seems to correlate with increased depth of invasion and higher frequency of metastases in malignant melanoma. More recent studies show higher production of TGF- $\alpha$  by dysplastic nevi in comparison with benign nevi,

supporting the hypothesis that the TGF- $\alpha$ /EGFR system has a role in the evolution of melanocytic lesions.<sup>31,32</sup>

The expression of  $\beta$ -human chorionic gonadotropin messenger RNA (mRNA) may serve as a marker for cutaneous melanoma.<sup>37</sup> Eighteen of 24 melanoma lines examined expressed  $\beta$ -human chorionic gonadotropin mRNA.<sup>37</sup>

Melatonin is a potent antitumor and immunostimulatory agent<sup>38,39</sup> available to the public without prescription. Melatonins at physiologic concentrations can inhibit cell proliferation and at pharmacologic doses, they can inhibit melanogenesis.<sup>40,41</sup> This hormone can be produced and degraded by mammalian skin.<sup>42</sup> Melatonin receptors are expressed on human melanoma cells,<sup>39</sup> and it has been suggested that defective melatonin receptors may be involved in the development of vitiligo.<sup>43</sup>

Recent evidence has documented that human skin expresses genes for corticotropin releasing hormone (CRH), CRH receptor (CRHR), and proopiomelanocortin (POMC) and can produce and secrete CRH- and POMC-derived peptides including melanocyte-stimulating hormone (MSH), corticotropin (ACTH), and  $\beta$ -endorphin.<sup>16,44–50</sup> These peptides can have an important role in skin physiology and pathology, such as regulation of the skin immune system, melanogenesis, and melanoma behavior.<sup>16,49</sup>

CRH, CRHR, and POMC all are components of the main adaptive response to systemic stress,<sup>51,52</sup> and also are expressed in human skin.<sup>48,49,53</sup> It is of particular interest that UV light (“melanocyte carcinogen”) can stimulate production of CRH, MSH, and ACTH and expression of CRHR and MC1 receptor genes. Furthermore, POMC-derived ACTH, MSH, and  $\beta$ -endorphin can act as immunomodulators and also can regulate the function of normal and malignant melanocytes. Melanomas can produce MSH peptides and, consequently, autoregulate their behavior via intracrine, autocrine, and paracrine mechanisms.<sup>16,46,49,54,55</sup> For example,  $\alpha$ -MSH is an immunosuppressor and stimulator of melanogenesis, and, depending on the genotype, it can regulate melanocyte proliferation.<sup>16,56,57</sup> It also has been reported that a mutation in the MC1 receptor may be associated with melanoma development.<sup>58</sup> The immunosuppressive and melanogenic functions of  $\alpha$ -MSH<sup>16,49,59</sup> suggest that an activation of the MSH-MC1 receptor system could accelerate melanoma development.

## DNA Analysis and Cytogenetics

An observed relationship between melanoma progression and DNA content provided the support for the hypothesis that DNA ploidy may be of prognostic value for the course of malignant melanoma.<sup>60–62</sup> Melanocytic lesions with little or no cytologic atypia tend to be euploid, while those with high-grade atypia are most commonly aneuploid,<sup>60</sup> and metastases also

express significantly higher aneuploidy than does the primary tumor.<sup>61</sup> When measured by tissue section image analysis, DNA aneuploidy has correlated with disease progression in intermediate-thickness level III melanomas, while diploid tumors have followed a benign course similar to thin, early stage cases.<sup>62</sup> DNA flow cytometry can be used to monitor response to chemotherapy in melanomas with metastases.<sup>63</sup>

In general, benign nevi have demonstrated a normal karyotype, whereas a high incidence of chromosomal abnormalities has been detected in dysplastic nevi or in atypical nevi from patients with familial atypical multiple mole melanoma syndrome.<sup>2,3,10,64,65</sup> Malignant melanomas are characterized by highly aneuploid karyotype with multiple chromosomal aberrations. Nonrandom karyotypic abnormalities of chromosomes 1, 6, 7, 9, 10, and 11 seem to be associated with increasing aggressiveness of melanoma.<sup>3,10,12,65–70</sup> Structural rearrangements of chromosome 1 have included isochromosome formation for the long arm, translocations, deletions, and duplications. Examples of these abnormalities are del(1)(p22), del(1)(p13), t(1;6)(q11;q11), t(1;19)(q12;p13), and t(1;14)(q21;q32). Studies using restriction fragment length polymorphism show significant loss of heterozygosity in 1p.<sup>10,71</sup> Chromosome 6 abnormalities are frequent in melanoma and have not been described in benign or dysplastic nevi.<sup>72</sup> The most common changes were nonreciprocal translocations or deletions involving the 6q11–6q24.<sup>10,65,69,71</sup> Molecular studies have shown an increased frequency of loss of heterozygosity in the middle of the 6q.<sup>73–75</sup> Studies with chromosome 6 transfer into melanoma cells have suggested that this chromosome may contain a tumor suppressor gene for malignant melanoma.<sup>76,77</sup> Studies of the loss of heterozygosity and molecular and genetic familial linkage have strongly supported a defect in chromosome 9p21 as having an important role in melanoma development,<sup>10,64,66,67,78–82</sup> possibly via a tumor suppressor gene or other genes located in this region.<sup>10,66,79–81,83–88</sup>

By using the techniques of fluorescence in situ hybridization<sup>89</sup> and polymerase chain reaction amplification protocols after tissue microdissection, it has been shown that loss of chromosomes 1pterp33, 16, 17, and 22 occurs in radial growth phase (RGP) and vertical growth phase (VGP), suggesting that VGP cells may be derived from the RGP.<sup>90</sup>

## Tumor Suppressor Genes and Oncogenes

Although the *p53* tumor suppressor gene is the most commonly mutated gene identified in human cancer, significant associations between *p53* gene mutations or altered expression of p53 protein and progression of melanocytic lesions have not been significant.<sup>91</sup> However, p53 could act on downstream effector genes, including MDM2, GADD45,

and CIP1/WAF1 in human melanoma,<sup>92</sup> and modulation of p53 expression may change the response of melanoma cells to chemotherapeutic agents.<sup>93</sup>

The tumor suppressor gene p16<sup>INK4</sup>, initially called MTS1/CKD41/CDKN2, maps to chromosome 9p13–22 containing putative locus of familial melanoma.<sup>78,80,83,84</sup> P16<sup>INK4</sup> binds to the catalytic subunit of CDK4 or CDK6, inhibiting the kinase activity of CDK4–cyclin D and CDK6–cyclin D kinase activity and acts as a negative regulator of cell cycle progression.<sup>78</sup> Human melanomas frequently carry nonsense, missense, frame shift, or p16<sup>INK4</sup> deletion mutations.<sup>78,80,83–85</sup> However, mutations at the p16<sup>INK4</sup> locus also have been detected in normal melanocytes and in benign compound nevi without signs of clinical and histologic atypia,<sup>86</sup> indicating that the loss of the p16<sup>INK4</sup> gene may not represent an initiating event in human melanocytic transformation and progression. Studies of the 9p21-linked familial melanoma suggest that germline p16<sup>INK4</sup> mutations explain most, if not all cases, whereas the genetic basis in the non–9p21-linked melanoma kindreds remains to be identified.<sup>94</sup> Recent immunocytochemical studies on expression of the p16<sup>INK4</sup> and CDK4 proteins showed that overexpression of CDK4 was characteristic for malignant melanoma,<sup>95</sup> while the expression of p16<sup>INK4</sup> in malignant melanoma was lower than that in benign nevi.<sup>95</sup> Other genes coding proteins regulating the cell cycle and potentially involved in melanocyte transformation include p15<sup>INK4B</sup>, p18, p19, and p21.<sup>66,78,79,81,85</sup> The p15<sup>INK4B</sup> is located on chromosome 9p21, and the recent finding of homozygous deletion of p15<sup>INK4B</sup> in some melanomas, despite the retention and expression of p16<sup>INK4</sup>,<sup>81</sup> emphasizes its possible role in melanoma progression.

Genes that may inhibit the metastatic potential of melanoma are potential candidates for tumor suppressors and include *nm23*, *nmb*, and *nma*.<sup>10,12,96,97</sup> The *nma* gene is located on chromosome 10, of which loss of heterozygosity has been described in malignant melanoma.<sup>98</sup>

The expression of the H-, K-, and N-*ras* proto-oncogenes in melanoma cells has been reported.<sup>10,12</sup> The mutated *ras* genes were detected in approximately 5% to 6% of noncultured melanoma specimens.<sup>10</sup> They were also found in benign nevi and in metastatic melanomas.<sup>10</sup> Although *ras* may have a role in proliferation of melanoma cells, its function in the development of melanoma remains to be clarified. Altered expression of the nuclear oncogenes *c-myb*, *c-myc*, *c-fos*, and *c-jun* was reported in cultured melanoma cells.<sup>10,12,99</sup> The KIT receptor has an important role in the migration and differentiation of melanoblasts toward melanocytes.<sup>100</sup> The KIT receptor acts as a regulator of melanocyte proliferation and differentiation, but its potential role in melanoma development remains unclear. Recently, a new nuclear protein

Mader, which may accompany the malignant transformation of melanocytes, has been described.<sup>101</sup>

## Differentiation Markers of Melanoma

Markers widely used in immunocytochemical diagnostic pathology are S-100 and HMB-45 antigens. The S-100 antigen is not specific because it also is expressed in other neuroectodermal cells and in Langerhans cells. However, the HMB-45 antigen is more specific, since it is localized in the premelanosomes and melanosomes of normal and malignant melanocytes. The gene for HMB-45 antigen (gp100) and for the antigens recognized by melanocyte specific antibodies, HMB-50 and NKI-beteb, has been cloned and identified as the Pmel 17 gene, which encodes a melanosomal enzyme converting the dihydroxyindole carboxylic acid form (DHICA) into melanin.<sup>102–104</sup> Other melanogenesis-related proteins include tyrosinase and tyrosinase-related proteins (TRP1 and TRP2) that also may serve as markers for cells of melanocytic lineage.<sup>105–109</sup>

Tyrosinase, a product of the *c*-locus, catalyzes the hydroxylation of L-tyrosine to L-dihydroxyphenylalanine (L-dopa), oxidation of L-dopa to dopaquinone, and oxidation of DHI to 5,6-dihydroxyquinone.<sup>109</sup> It has been suggested that tyrosinase also acts as a regulatory protein by controlling intracellular levels of L-dopa,<sup>110</sup> a potential intracrine regulator of gene expression.<sup>111,112</sup> Tyrosinase seems to be a better marker for melanoma than the widely used HMB-45. Serum tyrosinase activity and protein levels progressively increase in advanced melanotic melanoma.<sup>113</sup>

## Immune Markers of Melanoma

It has been proposed that a decrease in the expression of HLA class I molecules, which present antigens and activate CD8<sup>+</sup>, or changes in HLA-I specific subclasses may be associated with progression of melanoma. Specifically, a selective loss of HLA-A2 and/or A28 was found in 21% of primary tumors and in 44% of metastatic melanoma.<sup>114</sup> Within HLA class II molecules that activate CD4<sup>+</sup> lymphocytes, it has been reported that the expression of the HLA-DR and HLA-DP on melanoma cells increases with the progression from the radial growth phase to the vertical and metastatic growth phase. The number of Langerhans cells increases around in situ and early invasive melanomas and declines around deeply invasive tumors or cutaneous metastases.<sup>115</sup> Immunization protocols for the systemic treatment of melanoma are being developed that use recombinant viruses and bacteria, naked DNA containing tumor antigen genes, and genetically modified cells expressing or presenting tumor antigens.<sup>116–119</sup> Newer techniques include the administration of cytokines, such as IL-2, IL-10, IL-12, and INF- $\gamma$ , that would augment immunization of tumor recognition

or delivery of recombinant DNA containing cytokine or HLA and B7 molecule genes into the tumor.<sup>116-119</sup> In addition, tumor-reactive T cells stimulated with specific tumor antigens or T cells modified by transfection of complementary DNA for T-cell receptors recognizing tumor antigens can be transferred to melanoma patients.<sup>116-119</sup>

Stimulation of antibody production against cell surface antigens represents another immunotherapeutic approach for the treatment of melanoma.<sup>117,118</sup> Gangliosides are good candidates as substrates for antimelanoma vaccines.<sup>118</sup> Immunotherapy has used antiganglioside antibodies or immunization with ganglioside-containing antimelanoma vaccine,<sup>118</sup> and high molecular weight melanoma-associated antigens have been proposed as targets in antimelanoma therapy.<sup>12,120,121</sup>

### Molecular Markers of Metastatic Melanoma

Metastatic disease causes a dramatic decrease in the survival of patients with stage III and IV melanomas.<sup>2,3,122</sup> The first step in the metastatic cascade is dissemination of melanoma cells from the primary tumor; therefore, the expression of factors involved in cell adhesion, matrix degradation, migration, and colonization in relation to tumor development have been studied. For example, plasminogen activation can be an important step in the progression of malignant melanoma.<sup>123,124</sup> The expression of the cell adhesion molecules ICAM-1 and MUC18 on melanoma cells increases with increased tumor thickness and development of metastatic disease.<sup>125,126</sup> Increased serum levels of ICAM-1 suggest a poor prognosis.<sup>126</sup> Similarly, the expression of a particular class of integrins has been correlated positively with the level of invasion in localized melanoma or with the development of metastases.<sup>12,127</sup> Expression of CD44, a lymphocyte homing and cartilage attachment cell adhesion molecule, has been associated with increased cell motility and metastatic potential in malignant melanoma.<sup>128</sup> Thus, the expression of plasminogen activation components, ICAM-1, or MUC18, or of selected integrins deserves further clinical testing for usefulness as markers of melanoma progression.

It has been reported that the serum activity of tyrosinase<sup>113</sup> and enolase<sup>129</sup> and the serum and urine levels of precursors to melanin<sup>130-133</sup> correlate, to some degree, with the progression of human melanoma. The successful detection of mRNA for tyrosinase using the reverse transcription polymerase chain reaction technique in blood from patients with melanoma demonstrates that the expression of the tyrosinase gene can act as a specific and sensitive marker of melanoma progression.<sup>134</sup>

Researchers have documented that patients with advanced stages of melanoma demonstrate increased plasma or urine levels of melanin precursors including dopa, 5-S-cysteinyl-dopa, DHI and DHICA, and O-methyl derivatives of DHI and DHICA.<sup>130-133</sup> Precursors to melanin also have intrinsic biologic activity as potent immunosuppressors,<sup>135</sup> whereas

tyrosinase also may impair immune system function via extracellular oxidation of tyrosine and dopa to generate lymphocytotoxic precursors of melanogenesis.<sup>136</sup> Thus, increased serum levels of intermediate metabolites of melanogenesis or tyrosinase enzyme also may serve as potential indicators of impairment in the host immune response against melanoma.

*From the <sup>1</sup>Department of Pathology, Loyola University Medical Center, Maywood, Illinois; <sup>2</sup>Department of Medicine, Southern Illinois University, Springfield, Illinois; <sup>3</sup>Department of Pathology, Massachusetts General Hospital and Harvard Medical School, Boston, Massachusetts; and <sup>4</sup>Department of Pathology and Laboratory Medicine, Albany Medical College, Albany, New York.*

*Address reprint requests to Dr Ross: Department of Pathology and Laboratory Medicine, A-81, Albany Medical College, 47 New Scotland Ave, Albany, NY 12208.*

*Acknowledgment: We thank Barbara Rozhon for secretarial assistance in preparing this manuscript.*

### References

- Slominski A, Ross J, Mihm M. Cutaneous melanoma: pathology, relevant prognostic indicators and progression. *Br Med Bull.* 1995;51:548-569.
- Lejeune FJ, Chaudhuri PK, Das Gupta TK, eds. *Malignant Melanoma: Medical and Surgical Management.* New York, NY: McGraw-Hill; 1994.
- Balch CM, Houghton AN, Milton GW, et al, eds. *Cutaneous Melanoma.* Philadelphia, Pa: Lippincott; 1992.
- Gilbert SF, ed. *Developmental Biology.* Sunderland, Mass: Sinauer; 1988.
- Slominski A, Paus R, Schanderdorf D. Melanocytes as sensory and regulatory cells in the epidermis. *J Theor Biol.* 1993;164:103-120.
- Slominski A, Paus R. Melanogenesis is coupled to murine anagen: toward new concepts for the role of melanocytes and the regulation of melanogenesis in hair growth. *J Invest Dermatol.* 1993;101:90S-907S.
- Halaban R, Kwon BS, Ghosh S, et al. bFGF as an autocrine growth factor for human melanomas. *Oncogene Res.* 1988;3:177-186.
- Halaban R. Growth factors and tyrosine protein kinases in normal and malignant melanocytes. *Cancer Metastasis Rev.* 1991;10:129-140.
- Halaban R, Rubin JS, Funasaka Y, et al. Met and hepatocyte growth factor/scatter factor signal transduction in normal melanocytes and melanoma cells. *Oncogene.* 1992;7:2195-2206.
- Herlyn M, ed. *Molecular and Cellular Biology of Melanoma.* Austin, Tex: RG Landes; 1993.
- Yaar M, Gilchrist B. Human melanocyte growth and differentiation: a decade of new data. *J Invest Dermatol.* 1991;97:611-617.
- Weternan MAJ, Van Muije GNP, Bloemers HPJ, et al. Biology of disease: molecular markers of melanocytic tumor progression. *Lab Invest.* 1994;70:593-608.
- Thody AJ. Epidermal melanocytes: their regulation and role in skin pigmentation. *Eur J Dermatol.* 1995;5:558-565.

14. Imokawa G, Yada Y, Kimura M. Signalling mechanisms of endothelin-induced mitogenesis and melanogenesis in human melanocytes. *Biochem J*. 1996;314:305–312.
15. Krasagakis K, Garbe C, Orfanos CE. Cytokines in human melanoma cells: synthesis, autocrine stimulation and regulatory functions: an overview. *Melanoma Res*. 1993;3:425–433.
16. Slominski A, Paus R, Wortsman J. On the potential role of proopiomelanocortin in skin physiology and pathology. *Mol Cell Endocrinol*. 1993;93:C1–C6.
17. Kerbel RS. Expression of multi-cytokine resistance and multi-growth factor independence in advanced stage of metastatic cancer. *Am J Pathol*. 1992;141:519–524.
18. Armstrong CA, Botella R, Galloway TH, et al. Antitumor effects of granulocyte-macrophage colony-stimulating factor production by melanoma cells. *Cancer Res*. 1996;56:2191–2198.
19. Dummer W, Bastian BC, Ernst N, et al. Interleukin-10 production in malignant melanoma: preferential detection of IL-10-secreting tumor cells in metastatic lesions. *Int J Cancer*. 1996;66:607–610.
20. Lattime EC, Mastrangelo MJ, Bagasra O, et al. Expression of cytokine mRNA in human melanoma tissues. *Cancer Immunol Immunother*. 1995;41:151–156.
21. Kerbel RS, Kobayashi H, Graham CH, et al. Analysis and significance of the malignant “eclipse” during the progression of primary cutaneous human melanomas. *J Invest Dermatol Symp Proc*. 1996;1:183–187.
22. Scott G, Stoler M, Sarkar S, et al. Localization of basic fibroblast growth factor mRNA in melanocytic lesions by in situ hybridization. *J Invest Dermatol*. 1991;96:318–322.
23. Kahn R, Murray M, Pawelek J. Inhibition of proliferation of Cloudman S91 melanoma cells by insulin and characterization of some insulin-resistant variants. *J Cell Physiol*. 1980;103:109–119.
24. Bregman MD, Abdel Malek ZA, Meykens FL. Anchorage-independent growth of murine melanoma in serum-less media is dependent on insulin or melanocyte-stimulating hormone. *Exp Cell Res*. 1985;157:419–428.
25. Slominski A, McNeely T, Pawelek J. Insulin receptor proteolysis in insulin resistant variants of Cloudman S91 melanoma cells. *Melanoma Res*. 1992;2:115–122.
26. Pawelek J, Murray M, Fleischmann. Genetic studies of insulin action in Cloudman melanoma cells. *Cold Spring Harbor Conf Cell Prolif*. 1982;9:911–919.
27. Fleischmann RD, Pawelek JM. Evidence that a 90-kDa phosphoprotein, an associated kinase, and a specific phosphatase are involved in the regulation of Cloudman melanoma cell proliferation by insulin. *Proc Natl Acad Sci U S A*. 1985;82:1007–1011.
28. McNeely T, Slominski A, Bomirski A, et al. Phosphorylation of protein of approximately 90 K daltons is a factor in the regulation of melanoma cell growth by insulin and the expression of high affinity receptors for insulin. In: Puet D, ed. *Advances in Gene Technology: Molecular Biology of the Endocrine System*. ICSU Short Reports. Cambridge Mass: Cambridge University Press; 1986:4:55.
29. Elder DE, Rodeck U, Thurin J, et al. Antigenic profile of tumor progression stages in human melanocytic nevi and melanomas. *Cancer Res*. 1989;49:5091–5096.
30. Carrel S, Dore JF, Ruiter DJ, et al. The EORTC melanoma group exchange program: evaluation of a multicenter monoclonal antibody study. *Int J Cancer*. 1991;48:836–847.
31. Ellis DL, King LE, Nanney LB. Increased epidermal growth factor receptors in melanocytic lesions. *J Am Acad Dermatol*. 1992;27:539–546.
32. Nanney LB, Coffey RJ, Ellis DL. Expression and distribution of transforming growth factor- $\alpha$  within melanocytic lesions. *J Invest Dermatol*. 1994;103:707–714.
33. Reed JA, McNutt NS, Prieto VG, et al. Expression of transforming growth factor- $\beta$ 2 in malignant melanoma correlates with the depth of tumor invasion. *Am J Pathol*. 1994;145:97–104.
34. Schmid P, Itin P, Ruffli T. In situ analysis of transforming growth factors- $\beta$ s (TGF- $\beta$ 1, TGF- $\beta$ 2, TGF- $\beta$ 3), and TGF- $\beta$  type II receptor expression in malignant melanoma. *Carcinogenesis*. 1995;16:1499–1503.
35. Van Belle P, Rodeck U, Nuamah I, et al. Melanoma-associated expression of transforming growth factor- $\beta$  isoforms. *Am J Pathol*. 1996;148:1887–1894.
36. Fleming MG, Howe SF, Graf LH. Expression of insulin-like growth factor I (IGF-I) in nevi and melanomas. *Am J Dermatopathol*. 1994;16:383–391.
37. Dos F, Chi DDJ, Charuworn BB, et al. Detection of  $\beta$ -human chorionic gonadotropin mRNA as a marker for cutaneous malignant melanoma. *Int J Cancer*. 1996;65:454–459.
38. Lerner A, Case JD, Takahashi Y, et al. Isolation of melatonin, the pineal gland factor that lightens melanocytes. *J Am Chem Soc*. 1958;80:2857–2860.
39. Brzezinski A. Melatonin in humans. *N Engl J Med*. 1997;336:186–195.
40. Slominski A, Pruski D. Melatonin inhibits proliferation and melanogenesis in rodent melanoma cells. *Exp Cell Res*. 1993;206:189–194.
41. Slominski A, Chassalerris N, Mazurkiewicz J, et al. Murine skin as a target for melatonin bioregulation. *Exp Dermatol*. 1994;3:45–50.
42. Slominski A, Baker J, Rosano T, et al. Metabolism of serotonin to *N*-acetylserotonin, melatonin and 5-hydroxytryptamine in hamster skin culture. *J Biol Chem*. 1996;271:12281–12286.
43. Slominski A, Paus R, Bomirski A. Hypothesis: a possible role of the melatonin receptor in vitiligo. *J R Soc Med*. 1989;82:539–541.
44. Slominski A, Wortsman J, Mazurkiewicz J, et al. Detection of the proopiomelanocortin derived-antigens in normal and pathologic human skin. *J Lab Clin Med*. 1993;122:658–666.
45. Slominski A. POMC gene expression in mouse and hamster melanoma cells. *FEBS Lett*. 1991;291:165–168.
46. Schauer E, Trautinger F, Kock A, et al. Proopiomelanocortin-derived peptides are synthesized and released by human keratinocytes. *J Clin Invest*. 1994;93:2258–2262.
47. Slominski A, Ermak G, Hwang J, et al. Proopiomelanocortin, corticotropin releasing hormone and corticotropin releasing hormone receptor genes are expressed in human skin. *FEBS Lett*. 1995;374:113–116.
48. Slominski A, Baker J, Ermak G, et al. UVB stimulates production of corticotropin releasing factor (CRF) by human melanocytes. *FEBS Lett*. 1996;399:175–176.
49. Slominski A, Mihm M. On a potential mechanism of skin response to stress. *Int J Dermatol*. 1996;35:849–851.
50. Wintzen M, Gilchrest BA. Proopiomelanocortin, its derived peptides, and the skin. *J Invest Dermatol*. 1996;106:3–10.
51. Autelitano DJ, Lundblad JR, Blum M, et al. Hormonal regulation of POMC gene expression. *Annu Rev Physiol*. 1989;51:715–726.
52. Smith AI, Funder JE. Proopiomelanocortin processing in the pituitary, central nervous system, and peripheral tissues. *Endocr Rev*. 1988;9:159–179.
53. Slominski A, Ermak G, Mihm M. ACTH receptor, CYP11A1, CYP17 and CYP21A2 genes are expressed in skin. *J Clin Endocrinol Metab*. 1996;81:2746–2749.
54. Ghanem G, Lienrad D, Hanson P, et al. Increased serum alpha-melanocyte stimulating hormone (alpha-MSH) in human malignant melanoma. *Eur J Cancer Clin Oncol*. 1986;22:535–536.

55. Loir B, Bouchard B, Morandini R, et al. Immunoreactive  $\alpha$ -melanotropin as an autocrine effector in human melanoma cells. *Eur J Biochem.* 1997;244:923–930.
56. Siegrist W, Eberle AN. Melanocortins and their implication in melanoma. *Trends Endocrinol Metab.* 1995;6:115–120.
57. Hunt G. Melanocyte-stimulating hormone: a regulator of human melanocyte physiology. *Pathobiology.* 1995;63:12–21.
58. Valverde P, Healy E, Sikkink S, et al. The Asp84Glu variant of the melanocortin 1 receptor (MC1R) is associated with melanoma. *Hum Mol Genet.* 1996;5:1663–1666.
59. Luger TA, Scholzen T, Brzoska T, et al. Cutaneous immunomodulation and coordination of skin stress responses by alpha-melanocyte-stimulating hormone. *Ann N Y Acad Sci.* 1998. In press.
60. Schmidt B, Weinberg DS, Hollister K, et al. Analysis of melanocytic lesions by DNA image cytometry. *Cancer.* 1994;73:2971–2977.
61. Karlsson M, Boeryd B, Carstensen J, et al. DNA ploidy and S-phase fraction in primary melanomas and their regional metastases. *Melanoma Res.* 1994;4:47–51.
62. Bjornhagen V, Auer G, Lagerlof B, et al. DNA analysis in archival material from primary malignant melanoma. *Anal Quant Histol Cytol.* 1991;13:335–342.
63. Karlsson M, Jungnelius U, Aamdal S, et al. Correlation of DNA ploidy and S-phase fraction with chemotherapeutic response and survival in a randomized study of disseminated melanoma. *Int J Cancer.* 1996;65:1–5.
64. Parmiter RH, Nowell PC. Cytogenetics of melanocytic tumors. *J Invest Dermatol.* 1993;100:254S–258S.
65. Heim S, Mitelman F. *Cancer Cytogenetics.* New York, NY: Wiley-Liss; 1995.
66. Flores JF, Walker GJ, Glendening JM, et al. Loss of the p16<sup>INK4a</sup> and p15<sup>INK4b</sup> genes as well as neighboring 9p21 markers, in sporadic melanoma. *Cancer Res.* 1996;56:5023–5032.
67. Holland EA, Beaton SC, Edwards BG, et al. Loss of heterozygosity and homozygous deletions on 9q21-22 in melanoma. *Oncogene.* 1994;9:1361–1365.
68. Su YA, Trent JM. Genetics of cutaneous malignant melanoma. *Cancer Control.* 1995;2:392–397.
69. Thompson FH, Emerson J, Olson S, et al. Cytogenetics in 158 patients with regional or disseminated melanoma: subset analysis of near-diploid and simple karyotype. *Cytogenet Cell Genet.* 1995;83:93–104.
70. Robertson G, Coleman A, Lugo TG. A malignant melanoma tumor suppressor on human chromosome 11. *Cancer Res.* 1996;56:4487–4492.
71. Dracopoli NC, Houghton AN, Old LJ. Loss of polymorphic restriction fragments in malignant melanoma: implications for tumor heterogeneity. *Proc Natl Acad Sci U S A.* 1985;82:1470–1474.
72. Fountain JW, Bale SJ, Housman DE, et al. Genetics of melanoma. *Cancer Surv.* 1990;9:645–671.
73. Millikin D, Meese E, Vogelstein B, et al. Loss of heterozygosity for loci on the long arm of chromosome 6 in human malignant melanoma. *Cancer Res.* 1991;51:5449–5453.
74. Walker GJ, Palmer JM, Walters MK, et al. Simple tandem repeat allelic deletions confirm the preferential loss of distal chromosome 6q in melanoma. *Int J Cancer.* 1994;58:203–206.
75. Robertson GP, Coleman AB, Lugo TG. Mechanisms of human melanoma cell growth and tumor suppression by chromosome 6. *Cancer Res.* 1996;56:1635–1641.
76. Trent JM, Stanbridge EJ, McBride HL, et al. Tumorigenicity in human melanoma cell lines controlled by introduction of human chromosome 6. *Science.* 1990;247:568–571.
77. Ray ME, Su YA, Meltzer PS, et al. Isolation and characterization of genes associated with chromosome-6 mediated tumor suppression in human malignant melanoma. *Oncogene.* 1996;12:2527–2533.
78. Naylor MF, Everett MA. Involvement of the p16<sup>INK4</sup> (CDKN2) gene in familial melanoma. *Melanoma Res.* 1996;6:139–145.
79. Harber DA. Splicing into senescence: the curious case of p16 and p19<sup>ARF</sup>. *Cell.* 1997;91:555–558.
80. Borg A, Johansson U, Hakansson O, et al. Novel germline p16 mutation in familial melanoma in southern Sweden. *Cancer Res.* 1996;56:2497–2500.
81. Glendening JM, Flores JF, Walker GJ, et al. Homozygous loss of the p15<sup>INK4b</sup> gene (and not the p16<sup>INK4</sup> gene) during tumors progression in sporadic melanoma patients. *Cancer Res.* 1995;55:5531–5535.
82. Ohta M, Berd D, Shimizu M, et al. Deletion mapping of chromosome region 9p21p22 surrounding the CDKN2 locus in melanoma. *Int J Cancer.* 1996;65:762–767.
83. Kamb A, Gruis NA, Weaver-Feldhaus J, et al. A cell cycle regulator potentially involved in genesis of many tumor types. *Science.* 1994;264:436–440.
84. Holland EA, Beaton SC, Becker TM, et al. Analysis of the p16 gene, CDKN2, in 17 Australian melanoma kindreds. *Oncogene.* 1995;11:2289–2294.
85. Fitzgerald MG, Harkin DP, Silva-Arrieta S, et al. Prevalence of germline mutations in p16, p19<sup>ARF</sup>, and CDK4 in familial melanoma: analysis of a clinic-based population. *Proc Natl Acad Sci U S A.* 1996;93:8541–8545.
86. Wang Y, Becker D. Differential expression of the cyclin-dependent kinase inhibitors p16 and p21 in the human melanocytic system. *Oncogene.* 1996;12:1069–1075.
87. Reed JA, Loganzo F Jr, Shea CR, et al. Loss of expression of the p16/cyclin-dependent kinase inhibitor 2 tumor suppressor gene in melanocytic lesions correlates with invasive stage of tumor progression. *Cancer Res.* 1995;55:2713–2718.
88. Ohta M, Nagai H, Shimizu M, et al. Rarity of somatic and germline mutations of the cyclin-dependent kinase 4 inhibitor gene, CDK41, in melanoma. *Cancer Res.* 1994;54:5269–5272.
89. Gordon KB, Thompson CT, Char DH, et al. Comparative genomic hybridization in the detection of DNA copy number abnormalities in uveal melanoma. *Cancer Res.* 1994;54:4764–4768.
90. Wiltshire RN, Duray P, Bittner ML, et al. Direct visualization of the clonal progression of primary cutaneous melanoma: application of tissue microdissection and comparative genomic hybridization. *Cancer Res.* 1995;55:3954–3957.
91. Harris CC. P53: at the crossroads of molecular carcinogenesis and molecular epidemiology. *J Invest Dermatol Symp Proc.* 1996;1:115–118.
92. Bae I, Smith ML, Sheikh MS, et al. An abnormality in the p53 pathway following  $\gamma$ -irradiation in many wild-type p53 human melanoma lines. *Cancer Res.* 1996;56:840–847.
93. Davol PA, Goulette FA, Frackelton AR, et al. Modulation of p53 expression by human recombinant interferon- $\alpha$ 2a correlates with abrogation of cisplatin resistance in a human melanoma cell line. *Cancer Res.* 1996;56:2522–2526.
94. Zuo L, Weger J, Yang Q, et al. Germline mutations in the p16<sup>INK4a</sup> binding domain of CDK4 in familial melanoma. *Nat Genet.* 1996;12:97–99.
95. Wang YL, Uhara H, Yamazaki Y, et al. Immunocytochemical detection of CDK4 and p16<sup>INK4</sup> proteins in cutaneous malignant melanoma. *Br J Dermatol.* 1996;134:269–275.
96. Degen WGJ, Weterman AAJ, VanGroningen JJM, et al. Expression of nma, a novel gene, inversely correlates with the metastatic potential of human melanoma cell lines and xenografts. *Int J Cancer.* 1996;65:460–465.

97. Easty DJ, Maung K, Lascu I, et al. Expression of NM23 in human melanoma progression and metastasis. *Br J Cancer*. 1996;74:109–114.
98. Isshiki K, Elder DE, Guerry D, et al. Chromosome 10 allelic loss in malignant melanoma. *Genes Chromosomes Cancer*. 1993; 8:178–184.
99. Yamanishi DT, Buckmeier JA, Meyskens FL. Expression of c-jun, jun-B, and c-fos proto-oncogenes in human primary melanocytes and metastatic melanomas. *J Invest Dermatol*. 1991;97:349–353.
100. Manova K, Bachvarova RF. Expression of c-kit encoded at the W locus of mice in developing embryonic germ cells and presumptive melanoblasts. *Dev Biol*. 1991;146:312–324.
101. Kirsch KH, Korradi Y, Johnson JP. Mader: a novel nuclear protein over expressed in human melanomas. *Oncogene*. 1996;12:963–971.
102. Adema GJ, deBoer AJ, van't Hullenaar R, et al. Melanocyte lineage-specific antigens recognized by monoclonal antibodies NK1-beteb, HMB-50, and HMB-45 are encoded by a single cDNA. *Am J Pathol*. 1993;143:1579–1585.
103. Wagner SN, Wagner C, Hofler FH, et al. Expression cloning of the cDNA encoding a melanoma-associated Ag recognized by mAb HMB-45: identification as melanocyte-specific Pmel17 cDNA. *Lab Invest*. 1995;73:229–235.
104. Chakraborty AK, Platt JL, Kwon BS, et al. Polymerization of 5,6-dihydroxyindole 2-carboxylic acid to melanin by the PMEL17/silver locus. *Eur J Biochem*. 1996;236:180–188.
105. Kobayashi T, Urabe K, Winder A, et al. Tyrosinase related protein 1 (TRP1) functions as a DHICA oxidase in melanin biosynthesis. *EMBO J*. 1994;13:5818–5825.
106. Tsukamoto K, Jackson IJ, Urabe K, et al. A second tyrosinase-related protein, TRP2, is a melanogenic enzyme termed DOPAchrome tautomerase. *EMBO J*. 1992;11:519–526.
107. Yokoyama K, Yasumoto KI, Suzuki H, et al. Cloning of the human DOPAchrome tautomerase/tyrosinase-related protein 2 gene and identification of two regulatory regions required for its pigment cell-specific expression. *J Biol Chem*. 1994; 269:27080–27087.
108. DelMarmol V, Beermann F. Tyrosinase and related proteins in mammalian pigmentation. *FEBS Lett*. 1996;381:165–168.
109. Korner AM, Pawelek JM. Mammalian tyrosinase catalyzed three reactions in the biosynthesis of melanin. *Science*. 1982;217:1163–1165.
110. Slominski A, Moellmann G, Kuklinska E. L-tyrosine, L-dopa and tyrosinase as positive regulators of the subcellular apparatus of melanogenesis in Bomirski Ab amelanotic melanoma. *Pigment Cell Res*. 1989;2:109–116.
111. Slominski A, Paus R. Towards defining receptors for L-tyrosine and L-DOPA. *Mol Cell Endocrinol*. 1994;99:C7–C11.
112. Slominski A, Paus R. Are L-tyrosine and L-dopa hormone-like bioregulators. *J Theor Biol*. 1990;143:123–138.
113. Sonesson B, Elde S, Ringborg U, et al. Tyrosinase activity in the serum of patients with malignant melanoma. *Melanoma Res*. 1995;5:113–116.
114. Kageshita T, Wang Z, Calorini L, et al. Selective loss of human leukocyte class I allospecificities and staining of melanoma cells by monoclonal antibodies recognizing monomorphic determinants of class I human leukocyte antigens. *Cancer Res*. 1993;53:3349–3354.
115. Stene MA, Babajanians M, Bhuta S, et al. Quantitative alterations in cutaneous Langerhans cells during the evolution of malignant melanoma of the skin. *J Invest Dermatol*. 1988;91:125–128.
116. Nabel GJ, Gordon D, Biship DK, et al. Immune response in human melanoma after transfer of an allogeneic class I major histocompatibility complex gene with DNA-liposome complexes *Proc Natl Acad Sci U S A*. 1996;93:15388–15393.
117. Livingston PO, Ragupathi G. Carbohydrate vaccines that induce antibodies against cancer, 2: previous experience and future plans. *Cancer Immunol Immunother*. 1997;45:10–19.
118. Ravindranath MH, Morton DL. Immunogenicity of membrane-bound gangliosides in viable whole-cell vaccines. *Cancer Invest*. 1997;15:491–499.
119. Schadendorf D. Cytokines, autologous cell immunostimulatory, and gene therapy for cancer treatment. In: Bos JD, ed. *The Skin Immune System*. Boca Raton, Fla: CRC Press; 1997:657–659.
120. Kageshita T, Nakamura T, Yamada M, et al. Differential expression of melanoma associated antigens in acral lentiginous melanoma and in nodular melanoma lesions. *Cancer Res*. 1991;51:1726–1732.
121. Kageshita T, Kuriya N, Ono T, et al. Association of high molecular weight melanoma-associated antigen expression in primary acral lentiginous melanoma lesions with poor prognosis. *Cancer Res*. 1993;53:2830–2833.
122. Clark WH Jr, Elder DE, Guerry DP IV, et al. Model predicting survival in stage I melanoma based on tumor progression. *J Natl Cancer Inst*. 1989;81:1893–1904.
123. De Vries TJ, Quax PHA, Denijn M, et al. Plasminogen activators, their inhibitors, and urokinase receptor emerge in late stages of melanocytic tumor progression. *Am J Pathol*. 1994;144:70–81.
124. Debaldo C, Masouye I, Saurat JH, et al. Plasminogen activation in melanocytic neoplasia. *Cancer Res*. 1994;54:4547–4552.
125. Johnson JP, Lehmann JM, Stade BG, et al. Functional aspects of three molecules associated with metastasis development in human malignant melanoma. *Invasion Metastasis*. 1989;9: 338–350.
126. Kageshita T, Yoshii A, Kimura T, et al. Clinical relevance of ICAM-1 expression in primary lesions and serum of patients with malignant melanoma. *Cancer Res*. 1993;53:4927–4932.
127. Schadendorf D, Gawlik C, Haney U, et al. Tumor progression and metastatic behaviour in vivo correlates with integrin expression on melanocytic tumours. *J Pathol*. 1993;170:429–434.
128. Birch M, Mitchell S, Hart IR. Isolation and characterization of human melanoma cell variance expressing high and low levels of CD44. *Cancer Res*. 1991;51:6660–6667.
129. Wibe E, Hannisdal E, Paus E, et al. Neuron-specific enolase as a prognostic factor in metastatic melanoma. *Eur J Cancer*. 1992;28A:1692–1695.
130. Jimbow K, Lee SK, King MG, et al. Melanin pigments and melanosomal proteins as differentiation markers unique to normal and neoplastic melanocytes. *J Invest Dermatol*. 1993;100:259S–268S.
131. Rorsman H, Agrup G, Hansson C, et al. Biochemical recorders of malignant melanoma. In: MacKie RM, ed. *Pigment Cell*. Basel: Karger, 1983;6:93–115.
132. Hara H, Walsh N, Yamada K, et al. High plasma levels of a eumelanin precursor, 6-hydroxy-5-methoxyindole-2-carboxylic acid as a prognostic marker for malignant melanoma. *J Invest Dermatol*. 1994;102:501–505.
133. Horikoshi T, Ito S, Wakamatsu K, et al. Evaluation of melanin-related metabolites as markers of melanoma progression. *Cancer*. 1994;73:629–636.
134. Brossart P, Keilholz U, Willhauck M, et al. Hematogenous spread of malignant melanoma cells in different stages of disease. *J Invest Dermatol*. 1993;101:887–889.
135. Slominski A, Goodman-Snitkoff G. DOPA inhibits induced proliferative activity of murine and human lymphocytes. *Anticancer Res*. 1992;12:753–756.
136. Slominski A, Paus R. Inhibition of melanogenesis for melanoma therapy? *J Invest Dermatol*. 1995;103:742. Letter.

# First and Only FDA Cleared Digital Cytology System

Genius™ Cervical AI

Genius™ Review Station

Genius™ Digital Imager

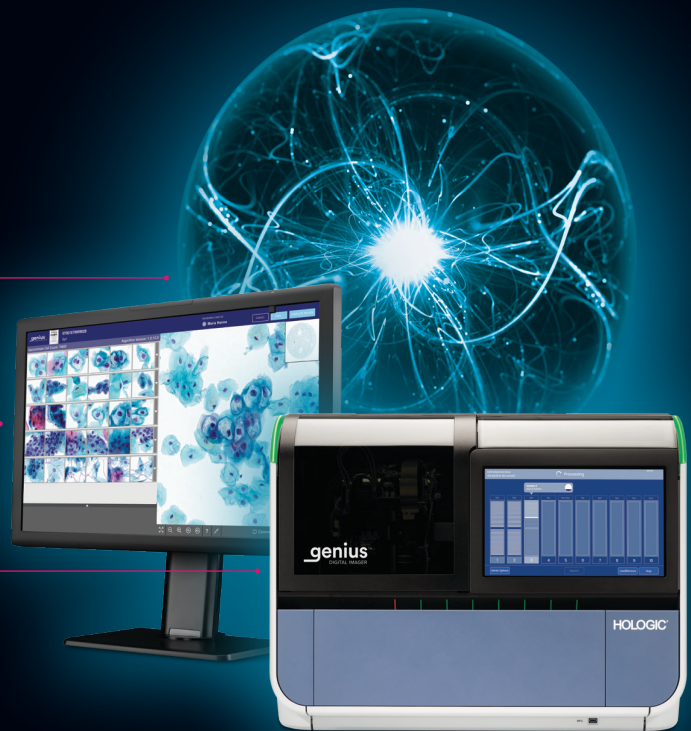

## Empower Your Genius With Ours

Make a Greater Impact on Cervical Cancer  
with the Advanced Technology of the  
Genius™ Digital Diagnostics System

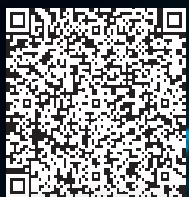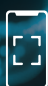

Click or Scan  
to discover more

ADS-04159-001 Rev 001 © 2024 Hologic, Inc. All rights reserved. Hologic, Genius, and associated logos are trademarks and/or registered trademarks of Hologic, Inc. and/or its subsidiaries in the United States and/or other countries. This information is intended for medical professionals in the U.S. and other markets and is not intended as a product solicitation or promotion where such activities are prohibited. Because Hologic materials are distributed through websites, podcasts and tradeshows, it is not always possible to control where such materials appear. For specific information on what products are available for sale in a particular country, please contact your Hologic representative or write to [diagnostic.solutions@hologic.com](mailto:diagnostic.solutions@hologic.com).

**genius™**  
DIGITAL DIAGNOSTICS
